# Supplementary material for: Interactome Analysis of iPSC Secretome and Its Effect on Macrophages In Vitro
Source: MDPI journal article supplement (doi:10.3390/ijms22020958), 2021-01-19
Supplement: s1 [file s1]

## Supplementary data

**Table S1: Frequency of macrophage surface markers:** Frequencies of macrophage surface markers (CD80, CD163 and CD206) are tabulated based on macrophage subtype and iPSCM-CM treatment. MDMs from different donors were used. Frequencies were measured from live, single, CD68+ cells in a BD LSR-II FACS. Results are expressed as Mean +/- SEM (n=3).

a)

| CD80                   | M0          | M1         | M2        | M2a       | M2b       | M2c       |
|------------------------|-------------|------------|-----------|-----------|-----------|-----------|
| Control                | 61.0 ± 1.2  | 15.6 ± 3.0 | 7.4 ± 3.4 | 1.7 ± 0.5 | 1.7 ± 0.5 | 0.6 ± 0.1 |
| iPS-cm                 | 62.1 ± 8.4  | 13.9 ± 2.8 | 5.2 ± 1.5 | 1.3 ± 0.2 | 1.3 ± 0.2 | 2.1 ± 0.7 |
| iPS-cm + APP           | 56.0 ± 2.8  | 7.3 ± 2.4  | 1.9 ± 1.2 | 0.8 ± 0.2 | 0.8 ± 0.2 | 0.4 ± 0.1 |
| iPS-cm + ELAVL-1       | 59.0 ± 12.2 | 20.1 ± 5.3 | 4.3 ± 1.8 | 2.6 ± 0.9 | 2.6 ± 0.9 | 4.2 ± 0.3 |
| iPS-cm + ELAVL-1 + APP | 63.1 ± 2.0  | 16.0 ± 3.2 | 3.0 ± 1.1 | 1.9 ± 0.6 | 1.9 ± 0.6 | 1.4 ± 0.2 |

b)

| CD163                  | M0         | M1         | M2        | M2a        | M2b       | M2c       |
|------------------------|------------|------------|-----------|------------|-----------|-----------|
| Control                | 72.7 ± 1.2 | 27.1 ± 2.1 | 7.6 ± 0.7 | 6.4 ± 0.3  | 6.8 ± 0.3 | 7.5 ± 0.5 |
| iPS-cm                 | 80.1 ± 5.9 | 33.7 ± 1.1 | 7.6 ± 1.5 | 7.0 ± 0.7  | 6.8 ± 0.5 | 9.1 ± 2.6 |
| iPS-cm + APP           | 75.5 ± 2.5 | 25.0 ± 1.3 | 7.8 ± 0.8 | 8.0 ± 0.4  | 8.4 ± 0.4 | 8.8 ± 0.3 |
| iPS-cm + ELAVL-1       | 81.0 ± 7.2 | 49.6 ± 5.1 | 6.4 ± 0.5 | 8.5 ± 0.8  | 8.4 ± 0.7 | 8.4 ± 0.8 |
| iPS-cm + ELAVL-1 + APP | 79.4 ± 1.0 | 51.2 ± 3.3 | 6.9 ± 0.6 | 10.3 ± 0.8 | 9.9 ± 1.2 | 9.7 ± 0.7 |

c)

| CD206                         | M0          | M1          | M2        | M2a        | M2b       | M2c        |
|-------------------------------|-------------|-------------|-----------|------------|-----------|------------|
| <b>Control</b>                | 32.9 ± 7.7  | 6.0 ± 2.3   | 7.4 ± 3.4 | 10.3 ± 1.1 | 5.1 ± 1.1 | 5.2 ± 2.0  |
| <b>iPS-cm</b>                 | 35.9 ± 14.1 | 18.2 ± 3.1  | 5.2 ± 1.5 | 7.8 ± 1.4  | 6.3 ± 0.9 | 6.4 ± 2.8  |
| <b>iPS-cm + APP</b>           | 31.8 ± 12.1 | 52.3 ± 3.0  | 1.9 ± 1.2 | 10.2 ± 2.5 | 9.4 ± 2.8 | 36.6 ± 4.5 |
| <b>iPS-cm + ELAVL-1</b>       | 52.5 ± 14.3 | 41.8 ± 17.2 | 4.3 ± 1.8 | 10.8 ± 0.7 | 9.2 ± 2.5 | 12.3 ± 3.2 |
| <b>iPS-cm + ELAVL-1 + APP</b> | 40.8 ± 4.1  | 62.1 ± 9.8  | 3.0 ± 1.1 | 38.7 ± 5.2 | 8.6 ± 1.7 | 16.5 ± 2.1 |

**Figure S1. Histograms of CD80, CD163 and CD206 expression:** % frequencies of live, single CD68+ macrophages. The effect of iPSC-cm on % frequencies is shown (upper panel).

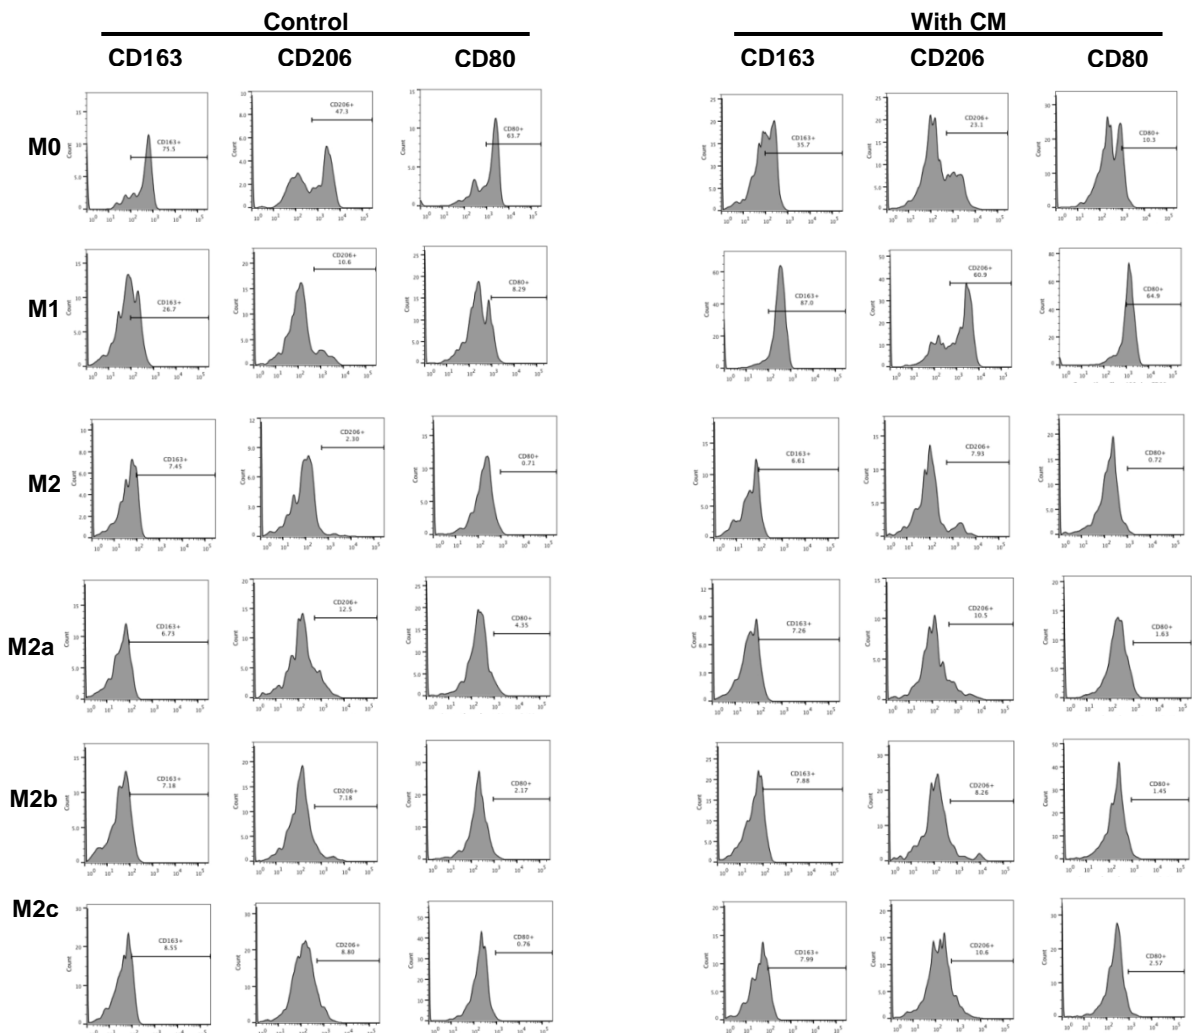

**Figure S2.** On the lower panel, the effect of APP or ELAVL1 depletion and double depletion of (APP+ELAVL1) on all macrophages subtypes treated with iPSC-cm. Frequencies were measured from live, single, CD68+ cells in a BD LSR-II FACS. A representative histogram is shown per condition (n=3).

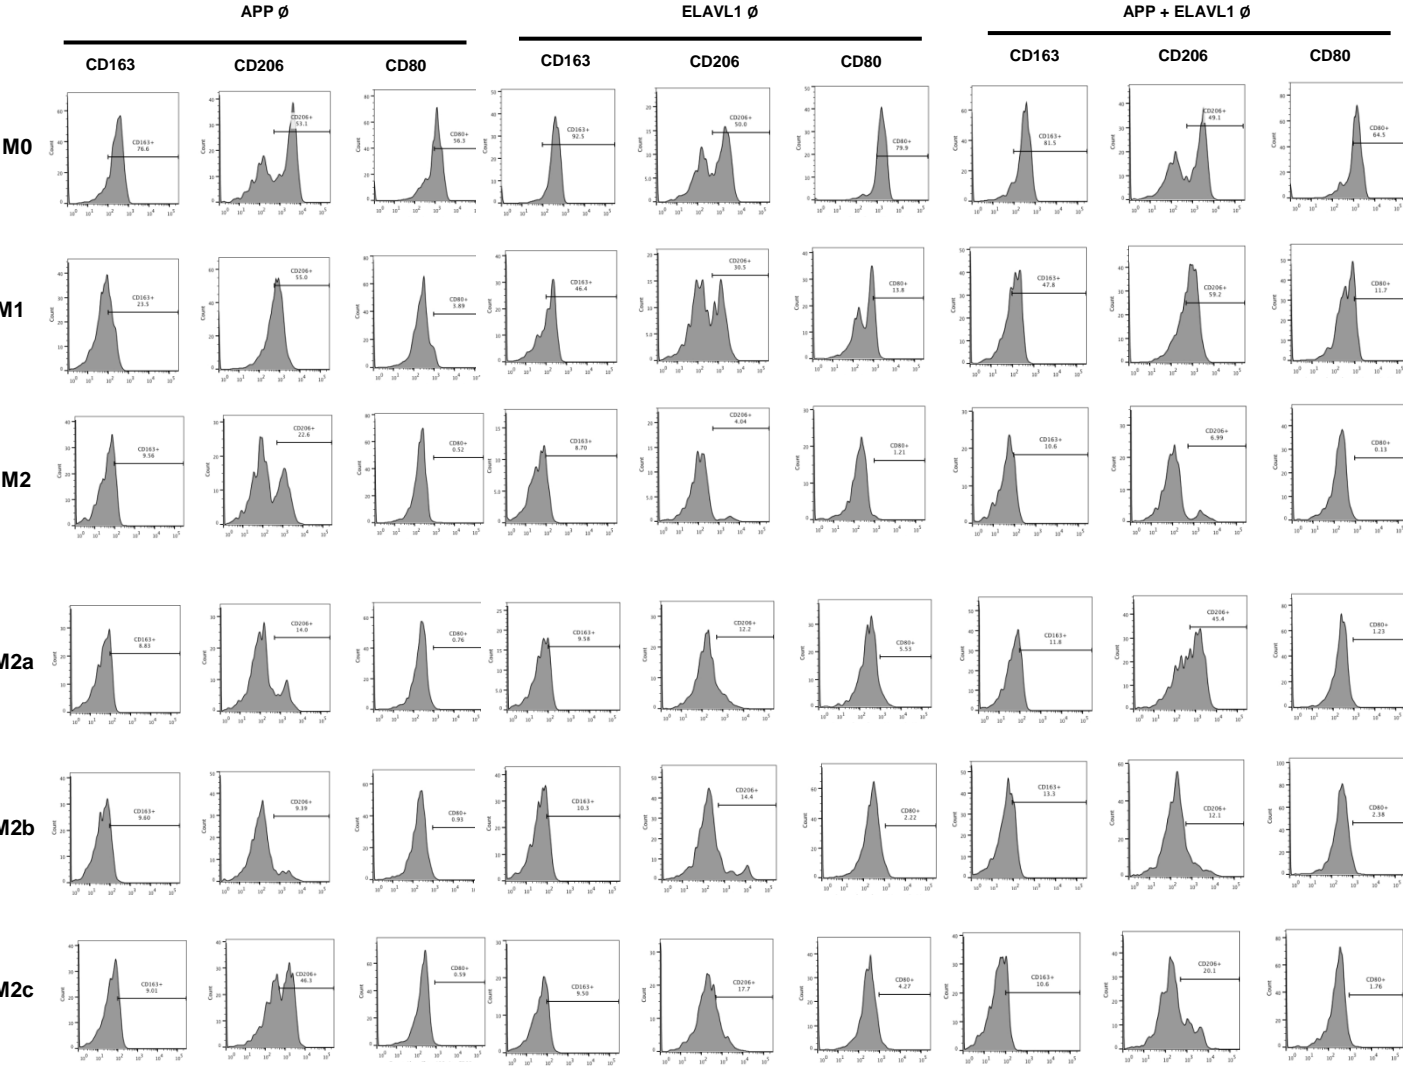

**Table S2:** Amount of cytokines secreted by M2a macrophages in response to various treatments. Values represented in ng/ml and data is presented as (mean±SEM).

|                    | IL-1 $\beta$ | CCL-8       | CSF-2       | CXCL-10    | MIF         |
|--------------------|--------------|-------------|-------------|------------|-------------|
| Control            | 7.2±1.4      | 653.2±316.1 | 32.04±2.67  | 9466±424.6 | 20367±805.2 |
| iPS-cm             | 18.05±0.035  | 505.6±108.8 | 27.08±3.49  | 5234±1366  | 33790±4179  |
| iPS-cm + APP       | 42.37±8.46   | 1164±591.2  | 79.45±17.89 | 18261±7352 | 17053±3671  |
| iPS-cm + ELAVL-1   | 19.51±4.79   | 1242±560.5  | 42.45±4.844 | 10602±1834 | 14943±1062  |
| iPS-cm+ELAVL-1+APP | 45.4±0.41    | 1040±64.58  | 102.1±23.91 | 12714±3635 | 18794±3472  |

**Table S3:** Relative mRNA gene expression in M2a macrophages in response to various treatments. Value represented as relative mRNA expression and data presented as (mean±SEM).

|                    | PDGFD        | TIMP-1       | COX2            | CD206        |
|--------------------|--------------|--------------|-----------------|--------------|
| Control            | 0.487±0.1961 | 4.927±2.83   | 0.3033±0.008819 | 29.12±0.9301 |
| iPS-cm             | 2.72±0.7977  | 8.457±3.705  | 1.154±0.1861    | 14.23±2.813  |
| iPS-cm + APP       | 1.332±0.6343 | 7.375±2.975  | 1.677±0.4334    | 25.83±2.986  |
| iPS-cm + ELAVL-1   | 8.293±7.37   | 13.5±2.116   | 2.053±1.296     | 10.74±0.3394 |
| iPS-cm+ELAVL-1+APP | 1.55±0.02887 | 4.911±0.5966 | 1.13±0.1559     | 7.8±3.002    |

**Table S4:** List of Primers used

|        |   |                                         |
|--------|---|-----------------------------------------|
| Cox-2  | F | 5'-GTC CTG GCG CTC AGC CAT ACA G-3'     |
|        | R | 5'-TCC TGT CCG GGT ACA ATC GCA C-3'     |
| PDGFD  | F | 5'-CCT CAG GCG AGA TGA GAG CAA TCA C-3' |
|        | R | 5'-TTC CTG GGG TAG CTG TTC GGG A-3'     |
| CD 206 | F | 5'- TGTATTCTTTGCCTTTCCCAGTCTC-3'        |
|        | R | 5'-CCTCAA AACAGACTTACCCAATAGCTG -3'     |
| TIMP-1 | F | 5'-GGC ATC CTG TTG TTG CTG TGG CT-3'    |
|        | R | 5'-TGG CCC TGA TGA CGA GGT CGG-3'       |
